# Supplementary material for: Atomically dispersed ruthenium sites with electron-rich environments in intermetallic compounds for high-current-density hydrogen evolution
Source: Royal Society of Chemistry journal article supplement (doi:10.1039/d3ta01376f), 2023-01-01
Supplement: d3ta01376f1.pdf [file d3ta01376f1.pdf]

## Supporting Information

### **Atomically dispersed ruthenium sites with electron-rich environments in intermetallic compounds for high-current-density hydrogen evolution**

Huaifang Zhang<sup>a, b, ‡</sup>, Chuanqi Cheng<sup>c, ‡</sup>, Jin Zhou<sup>d, ‡</sup>, Chaoqun Ma<sup>a, b</sup>, Peidong Shi<sup>e</sup>,  
Haoming Wu<sup>a, b</sup>, Pengfei Yin<sup>c</sup>, Wenbin Cao<sup>a</sup>, Jing Xia<sup>f</sup>, Lijie Zhu<sup>g\*</sup>, An-Liang Wang<sup>e\*</sup>,  
Qipeng Lu<sup>a, b, h\*</sup>

<sup>a</sup> School of Materials Science and Engineering, University of Science and Technology Beijing, Beijing 100083, China. E-mail: qipeng@ustb.edu.cn

<sup>b</sup> Shunde Innovation School, University of Science and Technology Beijing, Foshan 528399, China

<sup>c</sup> Institute of New Energy Materials, School of Materials Science and Engineering, Tianjin University, Tianjin 300072, China

<sup>d</sup> School of Chemical Engineering and Technology, Tianjin University, Tianjin 300072, China

<sup>e</sup> School of Chemistry and Chemical Engineering, Shandong University, Jinan 250100, China. E-mail: alwang@sdu.edu.cn

<sup>f</sup> Key Laboratory of Photochemical Conversion and Optoelectronic Materials, Technical Institute of Physics and Chemistry, Chinese Academy of Sciences, Beijing 100190, China

<sup>g</sup> School of Instrument Science and Opto-Electronics Engineering, Beijing Information Science and Technology University, Beijing 100192, China. E-mail: ljzhu@bistu.edu.cn

<sup>h</sup> Zhongguancun Institute of Human Settlements Engineering and Materials, Beijing 100083, China

<sup>‡</sup>These authors contributed equally to this work.

## Experimental

### Reagents and chemicals

Graphene oxide (GO) was purchased from Nanjing XFNANO Materials Tech Co., Ltd (Nanjing, China). Sodium nitrate ( $\text{NaNO}_3$ , 99.0%) and poly (vinyl alcohol) (PVA,  $M_w = 1750 \pm 50$ ) were obtained from Sinopharm Chemical Reagent Co., Ltd (Shanghai, China). Ruthenium nitrosyl nitrate solution ( $\text{Ru}(\text{NO})(\text{NO}_3)_3$ , 1.5%) and gallium nitrate nonahydrate ( $\text{Ga}(\text{NO}_3)_3 \cdot x\text{H}_2\text{O}$ , 99.99%) were supplied by Macklin Biochemical Co., Ltd (Shanghai, China). All reagents and chemicals were of analytical grade and used without further purification.

### Synthesis of RuGa/N-rGO, Ru/N-rGO and N-rGO

In a standard synthesis of RuGa/N-rGO, 0.075 mmol  $\text{Ru}(\text{NO})(\text{NO}_3)_3$  and 0.075 mmol  $\text{Ga}(\text{NO}_3)_3 \cdot 9\text{H}_2\text{O}$  were added to 0.5 mL of PVA aqueous solution ( $20 \text{ mg mL}^{-1}$ ) and sonicated until completely dissolved. Meanwhile, 64 mg of GO was dissolved in 4 mL of deionized water and continuously sonicated to form a homogeneous solution. Then, GO aqueous solution was quickly added to the above PVA solution. The mixture was strongly shaken to form the  $\text{Ru}(\text{NO})(\text{NO}_3)_3\text{-Ga}(\text{NO}_3)_3/\text{GO-PVA}$  hydrogels. Subsequently, the resulting hydrogels were freeze-dried at  $-50 \text{ }^\circ\text{C}$  to form the  $\text{Ru}(\text{NO})(\text{NO}_3)_3\text{-Ga}(\text{NO}_3)_3/\text{GO-PVA}$  aerogels. Finally, the aerogels were annealed at different annealing temperatures for 12 hours under  $\text{H}_2/\text{Ar}$  (10 vol.%  $\text{H}_2$ ) with a heating rate of  $5 \text{ }^\circ\text{C min}^{-1}$ . The aerogels annealed at 700, 800, and 900  $^\circ\text{C}$  were designated as RuGa/N-rGO-1, RuGa/N-rGO-2, and RuGa/N-rGO-3, respectively. The final products

were washed with deionized water several times.

The synthetic procedures of Ru/N-rGO were similar to those of RuGa/N-rGO-2 without the addition of  $\text{Ga}(\text{NO}_3)_3 \cdot 9\text{H}_2\text{O}$ .

The synthetic procedures of N-rGO were similar to those of RuGa/N-rGO-2, but 0.525 mmol of  $\text{NaNO}_3$  was used instead of the 0.075 mmol of  $\text{Ru}(\text{NO})(\text{NO}_3)_3$  and 0.075 mmol of  $\text{Ga}(\text{NO}_3)_3 \cdot 9\text{H}_2\text{O}$ .

### **Physicochemical characterizations**

The X-ray powder diffraction (XRD) patterns of different nanomaterials were taken on a Bruker D8 Advance diffractometer equipped with  $\text{Cu K}\alpha$  radiation ( $\lambda = 0.15406 \text{ nm}$ ).

The scanning electron microscopy (SEM) images were collected on a Hitachi S-4800 scanning electron microscope. Transmission electron microscopy (TEM) images, high-resolution TEM (HRTEM) images, and selected area electron diffraction (SAED) patterns were obtained on a JEOL JEM-2100F transmission electron microscope manipulated at 200 kV. High-angle annular dark-field scanning transmission electron microscopy (HAADF-STEM) images, aberration-corrected HAADF-STEM images, and energy-dispersive X-ray spectroscopy (EDX) elemental mapping images were performed on a JEOL JEM-ARM300F Grand ARM transmission electron microscope operated at an accelerating voltage of 300 kV accelerating voltage with a cold field-emission electron gun, double spherical aberration correctors, and SDD-type EDX detectors. Atomic force microscopy (AFM) images were achieved by using a Bruker Dimension Icon atomic force microscope. The Raman spectra were recorded on a

Horiba Jobin Yvon LabRam HR800 spectrometer employing a 514 nm laser light. The X-ray photoelectron spectroscopy (XPS) spectra were carried out on a Thermo Scientific ESCALAB 250Xi spectrometer using an Al K $\alpha$  radiation, and all binding energies were calibrated by the C 1s peak energy of 284.8 eV. The Brunauer-Emmett-Teller (BET) specific surface area and pore size were carried out on a Micromeritics ASAP 2460 Surface Area and Porosimetry analyzer at 77 K. The accurate metal contents were quantified by inductively coupled plasma atomic emission spectroscopy (ICP-AES) on an Agilent ICPOES730 instrument.

### **Electrochemical measurements**

All electrochemical measurements were performed on a CHI 760D electrochemical workstation (Shanghai, Chenhua Co.) with a standard three-electrode system. For a conventional three-electrode system, a catalyst-modified glassy carbon electrode (GCE, 0.0706 cm<sup>2</sup>) served as the working electrode, a graphite rod was regarded as the assistant electrode, and a saturated calomel electrode (SCE) was used as the reference electrode, respectively. For the preparation of the working electrode, different amount of the as-prepared catalysts was uniformly dispersed in 1.0 mL of isopropanol to prepare the homogeneous catalyst ink. Subsequently, the 15  $\mu$ L of homogeneous catalyst ink was pipetted onto the surface of cleaned GCE and dried at room temperature. Finally, 3.0  $\mu$ L of Nafion solution (0.5 wt.%) was dropped onto the surface of the catalyst-modified working electrode. The loading amount of metal (Ru or Pt) on the working electrode was controlled to be 6.0  $\mu$ g.

The N<sub>2</sub>-saturated 0.5 M H<sub>2</sub>SO<sub>4</sub> and 1.0 M KOH solutions were used as the acidic and alkaline electrolytes, respectively. All the potential values presented in this paper have been calibrated to the reversible hydrogen electrode (RHE) using the conversion formula:  $E_{\text{RHE}} = E_{\text{SCE}} + 0.0591 \text{ pH} + 0.242$ . The linear sweep voltammetry (LSV) measurements were assessed with a sweep rate of 5 mV s<sup>-1</sup> and all data were manually *iR*-corrected. The linear regions of the Tafel plots were fitted by the Tafel equation  $\eta = a + b \log|j|$ , where  $\eta$  stands for the overpotential,  $a$ ,  $b$  and  $j$  refer to the Tafel constant, Tafel slope, and the current density, respectively. The double-layer capacitance ( $C_{\text{dl}}$ ) of the different electrocatalysts was obtained from the cyclic voltammogram (CV) measurements at various scan rates of 20~200 mV s<sup>-1</sup> in a non-faradic potential range of 0.1 V to 0.2 V. The value of  $C_{\text{dl}}$  was calculated by fitting the difference between the positive and negative current densities ( $\Delta j$ ) at 0.15 V against the scan rate, where the slope is twice  $C_{\text{dl}}$ . The electrochemical impedance spectroscopy (EIS) measurements were investigated with a frequency range from 100 kHz to 0.01 Hz. The accelerated degradation tests were measured for 10,000 cycles from -0.2 to 0.0 V with a sweep rate of 100 mV s<sup>-1</sup>.

### Calculation details

Density functional theory (DFT) calculations were performed using Vienna *ab-initio* Simulation Package (VASP) software.<sup>1, 2</sup> The projector augmented wave (PAW) pseudopotential with the Perdew-Burke-Ernzerhof (PBE) and generalized gradient approximation (GGA) exchange-correlation function was employed in the computations.<sup>3-5</sup> The DFT-D3 method was adopted to describe the van der Waals

interactions.<sup>6,7</sup> The cutoff energy of 500 eV was employed for the plane-wave basis set of all calculations, and a Monkhorst-Pack k-point mesh of 3×3×1 was used in the structural optimization. The convergence threshold in structural optimization was set as 10<sup>-5</sup> eV for energy and 0.01 eV Å<sup>-1</sup> for force. The transition state (TS) searches are performed using the Dimer method in the VTST package. The final force on each atom was < 0.2 eV Å<sup>-1</sup>. The TS searches are conducted by using the climbing-image nudged elastic band (CI-NEB) method to generate initial guess geometries, followed by the dimer method to converge to the saddle points. To avoid periodical interactions, a vacuum space of 15 Å was added in the z-direction. The RuGa (110), Pt (111), and Ru (001) facets are chosen as the structural models for DFT calculations. The Gibbs free energy change ( $\Delta G$ ) of each elementary reaction can be computed by the following equation:  $\Delta G = \Delta E + \Delta ZPE - T\Delta S$ .

Where  $\Delta E$  is the reaction energy difference,  $\Delta ZPE$  is the zero-point energy change,  $T$  is the temperature, and  $\Delta S$  is the entropy change, respectively.

## Figures and Tables

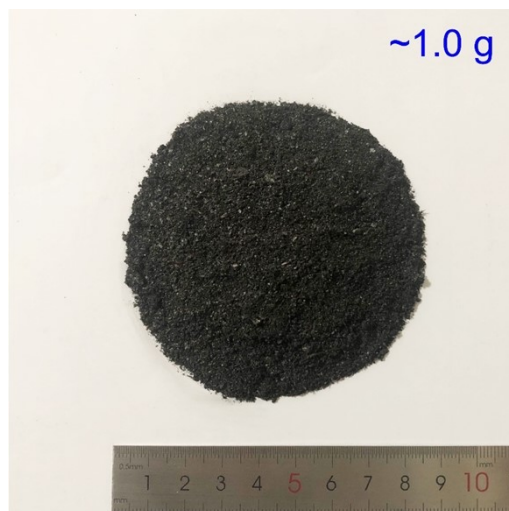

**Figure S1.** Photograph of RuGa/N-rGO electrocatalyst (~1.0 g).

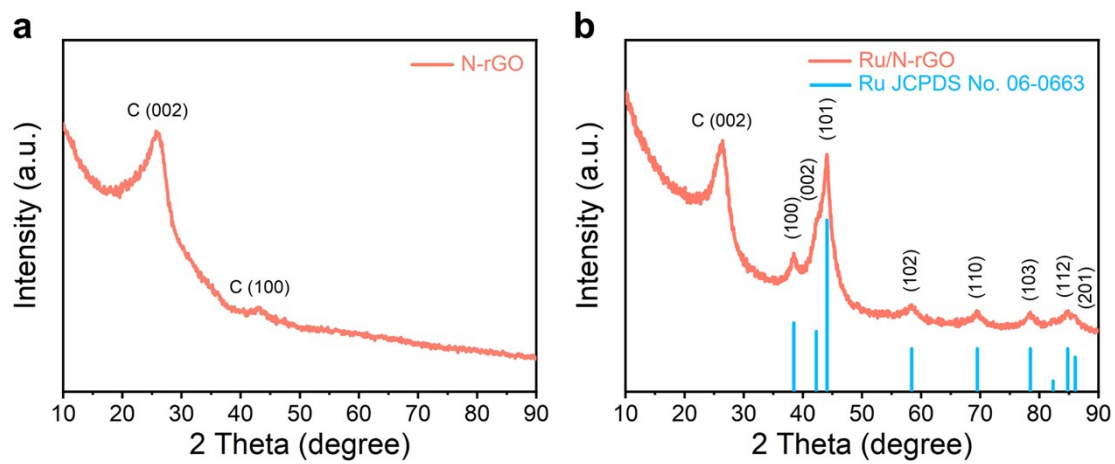

**Figure S2.** XRD patterns of (a) N-rGO and (b) Ru/N-rGO.



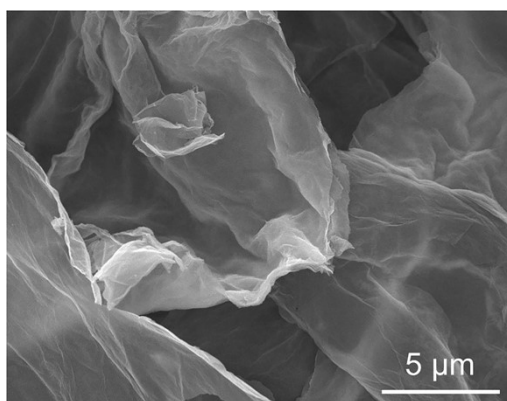

**Figure S3.** SEM image of RuGa/N-rGO.

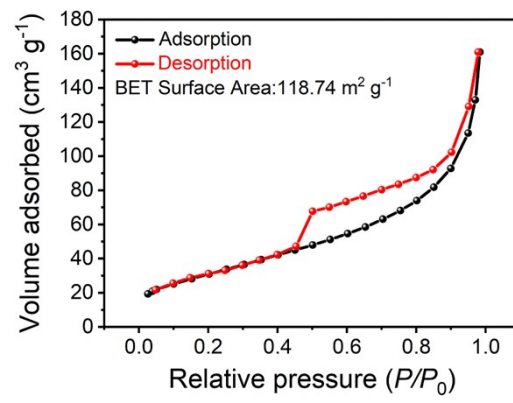

**Figure S4.** N<sub>2</sub> adsorption-desorption isotherms of RuGa/N-rGO.

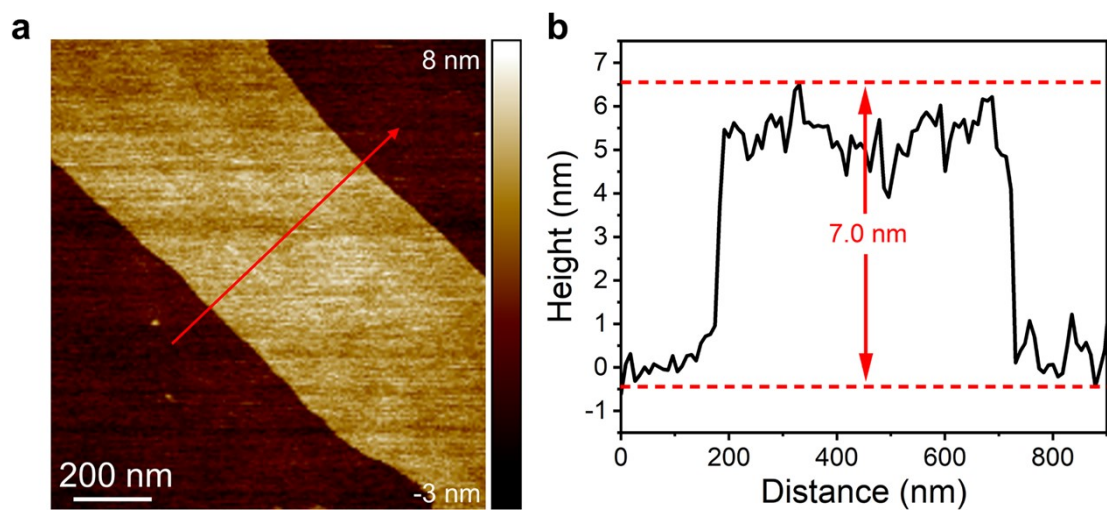

**Figure S5.** (a) AFM image of RuGa/N-rGO. (b) The corresponding height profile along the red line in a.

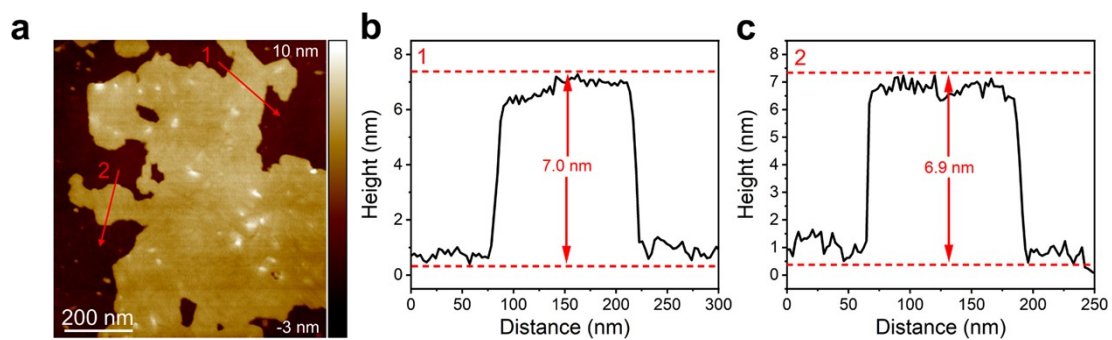

**Figure S6.** (a) AFM image of Ru/N-rGO. (b,c) The corresponding height profiles along the red lines in a.

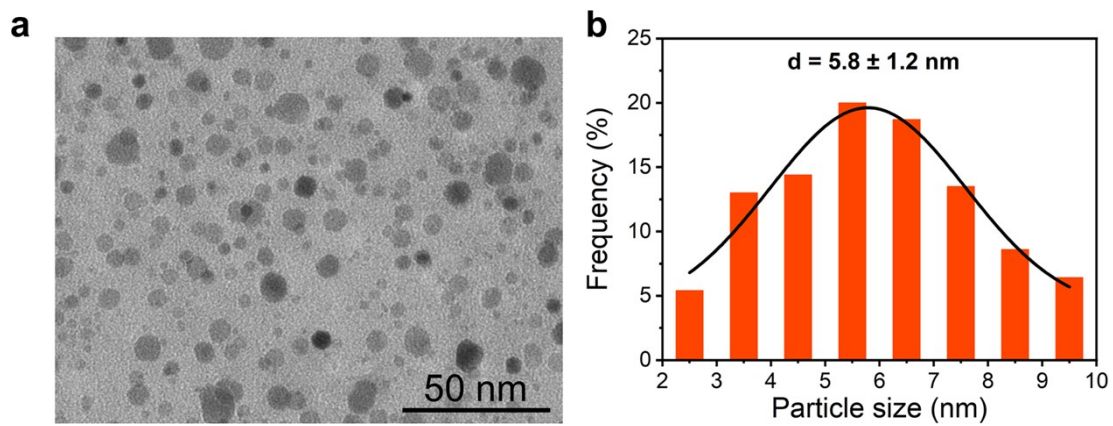

**Figure S7.** (a) TEM image of Ru/N-rGO. (b) The corresponding particle size distribution histogram.

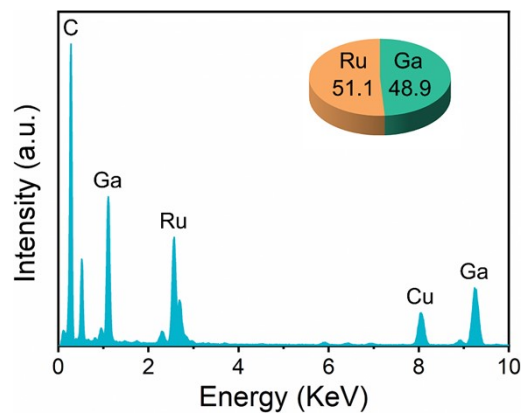

**Figure S8.** EDX spectrum of RuGa/N-rGO.

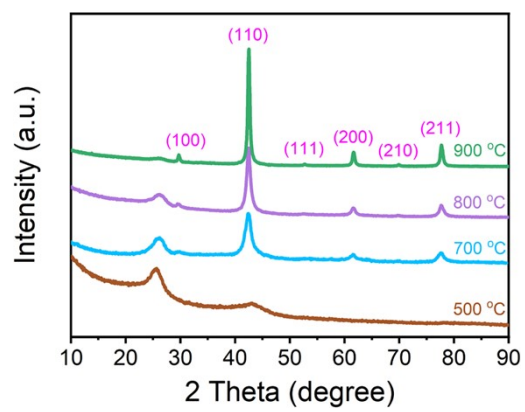

**Figure S9.** XRD patterns of RuGa/N-rGO samples annealed at different temperatures for 12 h.

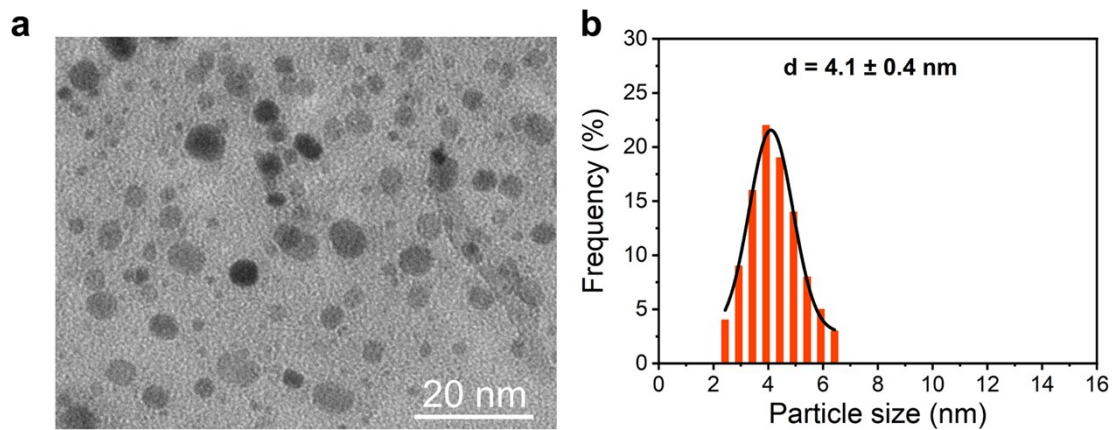

**Figure S10.** (a) TEM image of RuGa/N-rGO-1. (b) The corresponding particle size distribution histogram.



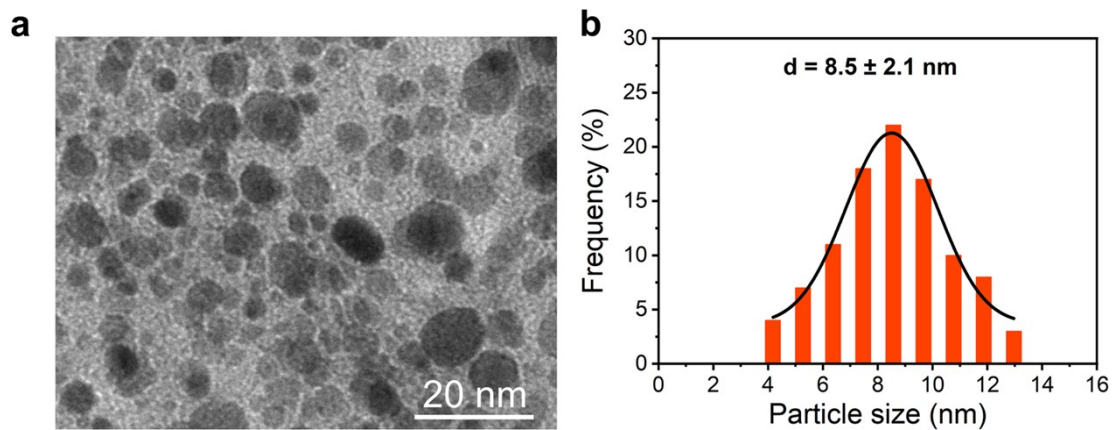

**Figure S11.** (a) TEM image of RuGa/N-rGO-3. (b) The corresponding particle size distribution histogram.

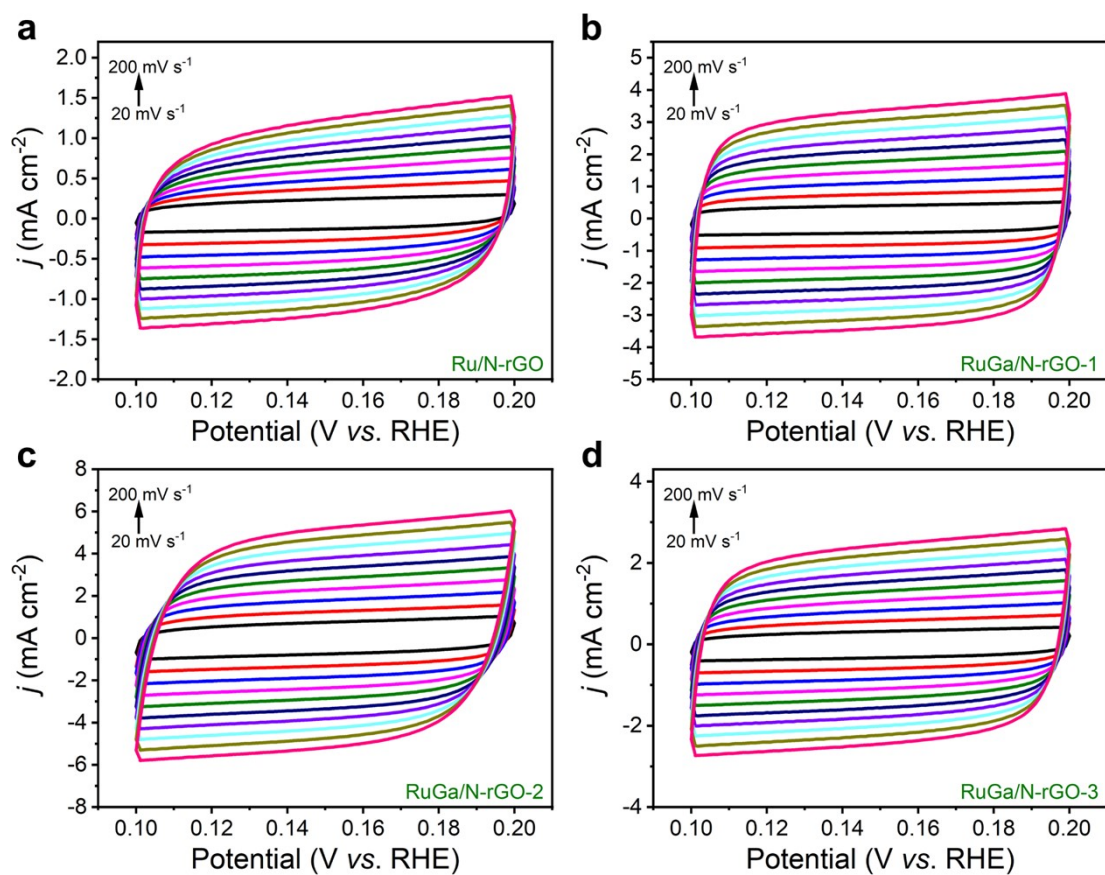

**Figure S12.** Cyclic voltammety curves of (a) Ru/N-rGO, (b) RuGa/N-rGO-1, (c) RuGa/N-rGO-2, and (d) RuGa/N-rGO-3 at different scan rates in 0.5 M H<sub>2</sub>SO<sub>4</sub> solution.

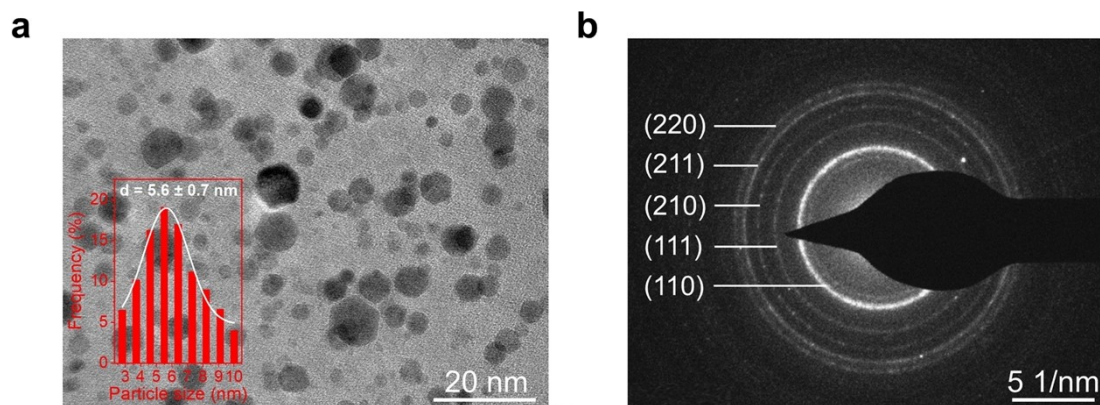

**Figure S13.** (a) Low-magnification TEM image of RuGa/N-rGO-2 after the long-term durability test in 0.5 M H<sub>2</sub>SO<sub>4</sub> solution, the inset is the corresponding size distribution histogram. (b) SAED pattern of RuGa/N-rGO-2 after the long-term durability test in 0.5 M H<sub>2</sub>SO<sub>4</sub> solution.

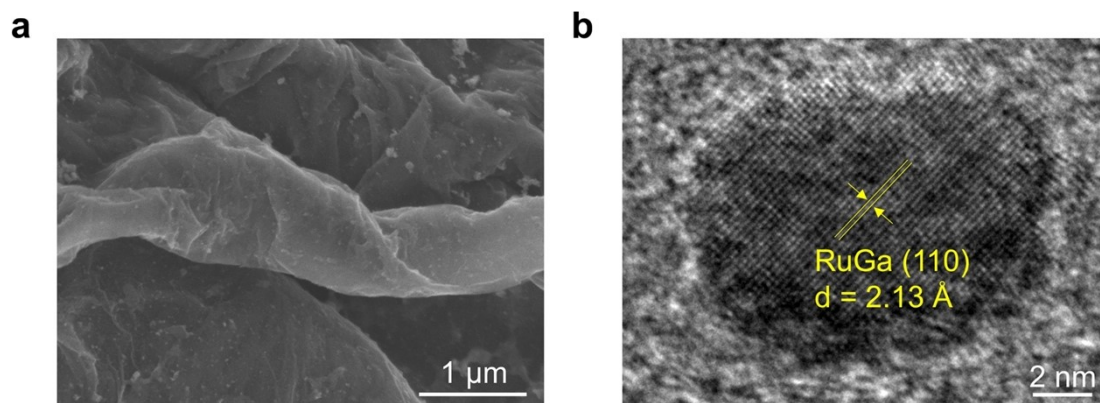

**Figure S14.** (a) SEM image and (b) HRTEM image of RuGa/N-rGO-2 after the long-term durability test in 0.5 M H<sub>2</sub>SO<sub>4</sub> solution.

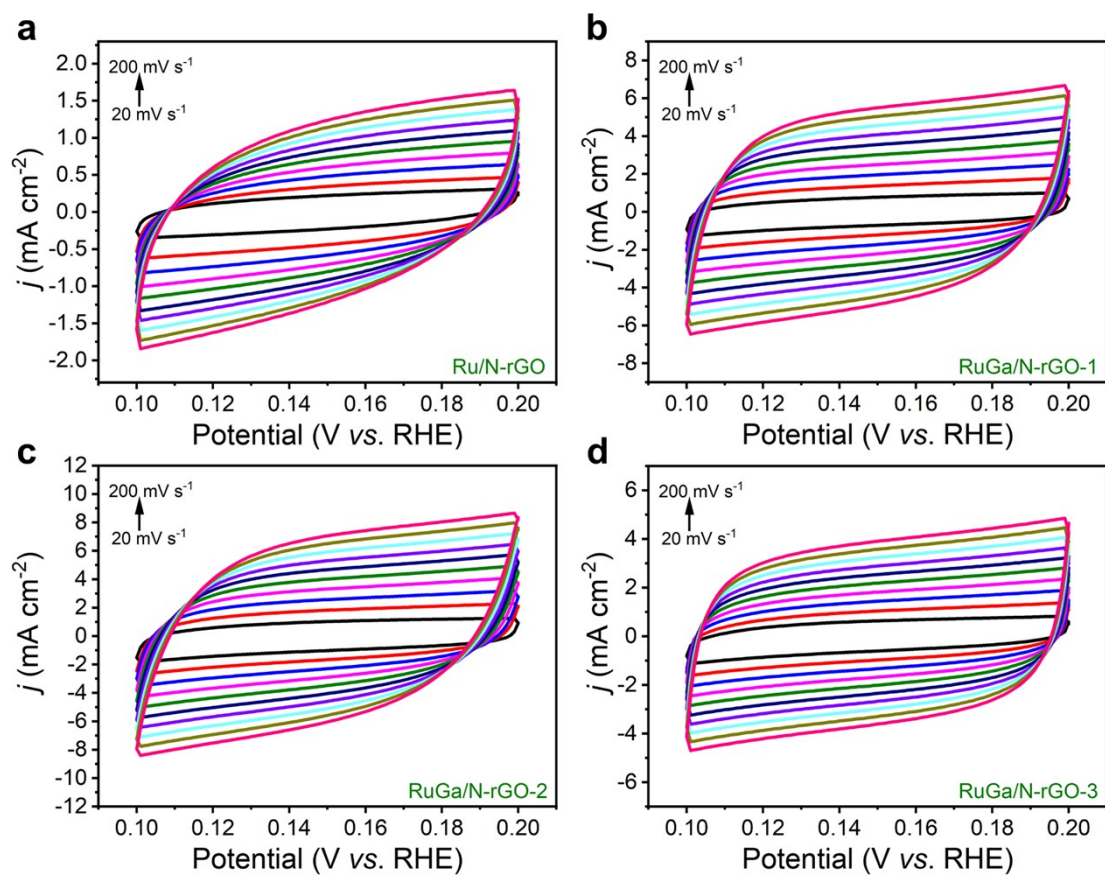

**Figure S15.** Cyclic voltammety curves of (a) Ru/N-rGO, (b) RuGa/N-rGO-1, (c) RuGa/N-rGO-2, and (d) RuGa/N-rGO-3 at different scan rates in 1.0 M KOH solution.

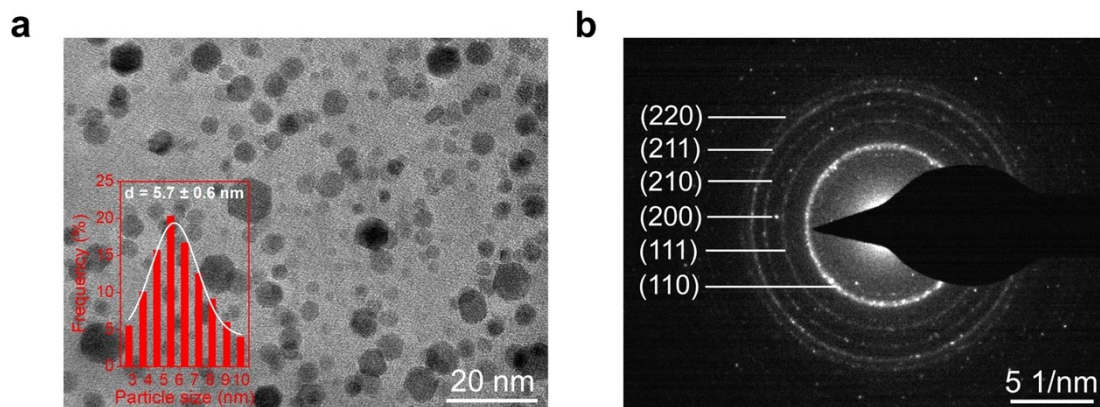

**Figure S16.** (a) Low-magnification TEM image of RuGa/N-rGO-2 after the long-term durability test in 1.0 M KOH solution, the inset is the corresponding size distribution histogram. (b) SAED pattern of RuGa/N-rGO-2 after the long-term durability test in 1.0 M KOH solution.

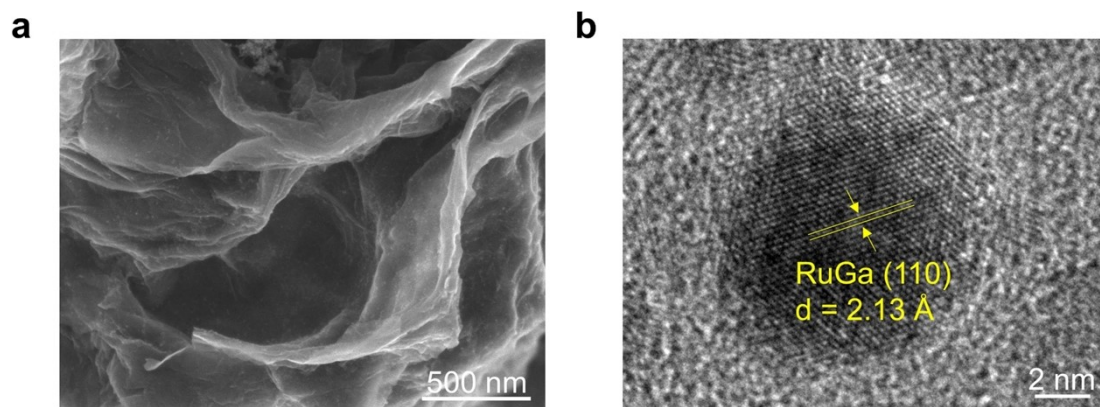

**Figure S17.** (a) SEM image and (b) HRTEM image of RuGa/N-rGO-2 after the long-term durability test in 1.0 M KOH solution.

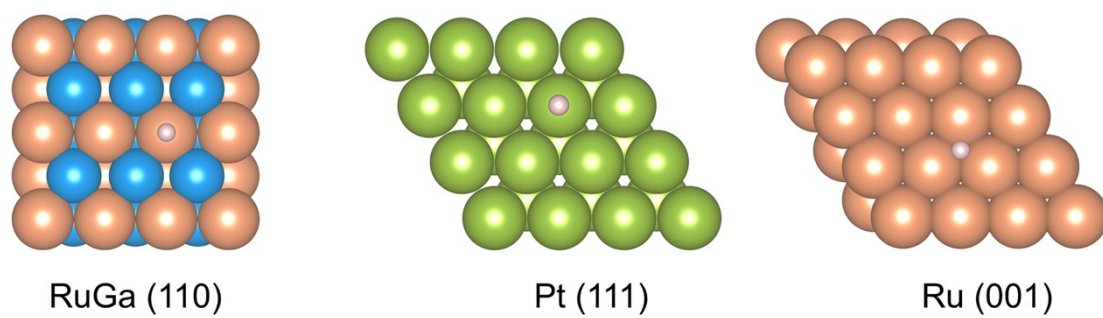

**Figure S18.** Structural models of \*H intermediate for the acidic HER process on RuGa (110), Pt (111), and Ru (001).



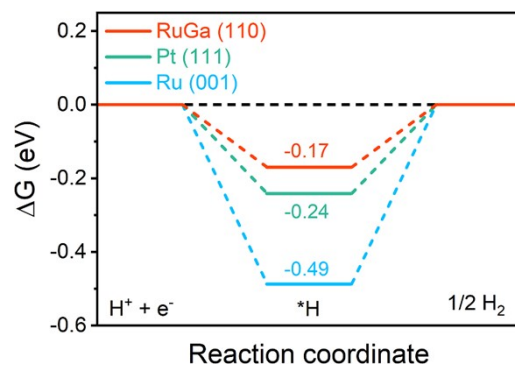

**Figure S19.** Calculated free energy diagrams for HER on RuGa (110), Pt (111), and Ru (001) in acidic condition.

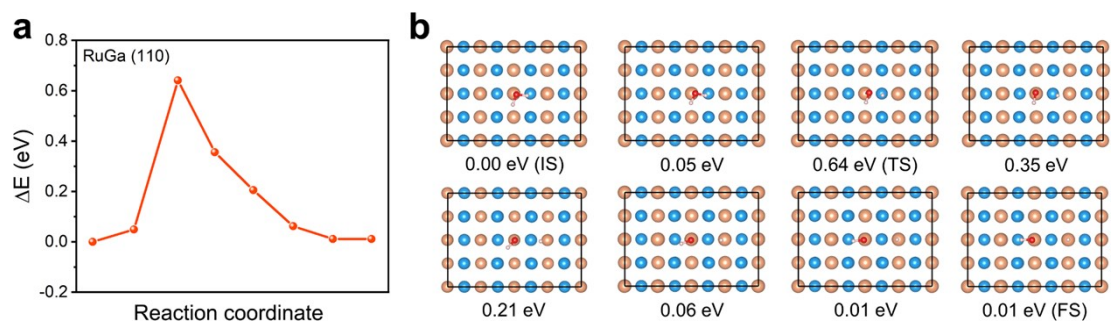

**Figure S20.** (a) Predicted water dissociation energy barriers on RuGa (110) and (b) corresponding structural models.

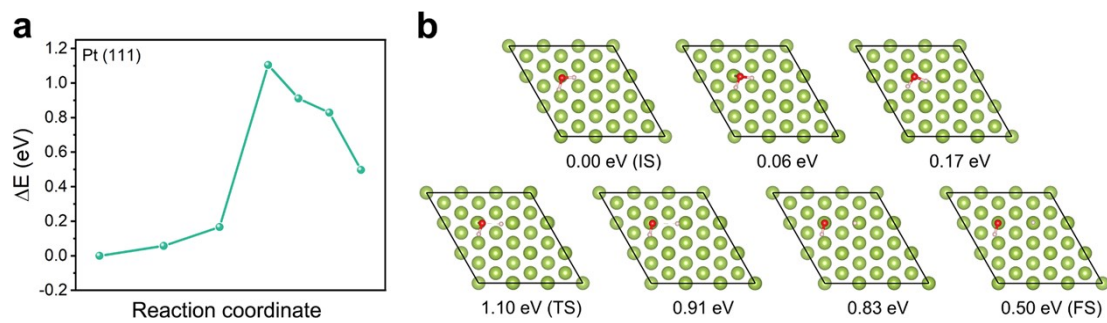

**Figure S21.** (a) Predicted water dissociation energy barriers on Pt (111) and (b) corresponding structural models.

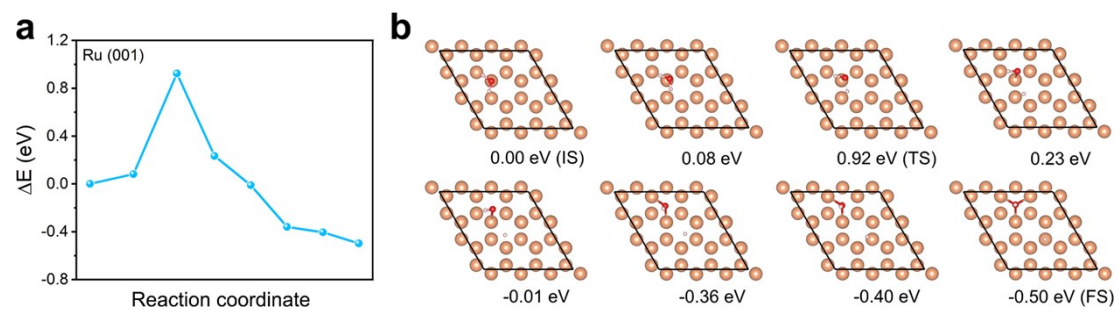

**Figure S22.** (a) Predicted water dissociation energy barriers on Ru (001) and (b) corresponding structural models.

**Table S1.** Mass and atomic percentage of Ru and Ga elements obtained from ICP-AES.

| <b>Catalysts</b> | <b>Ru (wt.%)</b> | <b>Ga (wt.%)</b> | <b>Ru/Ga (at.%)</b> |
|------------------|------------------|------------------|---------------------|
| RuGa/N-rGO-1     | 16.86            | 11.58            | 50.11:49.89         |
| RuGa/N-rGO-2     | 18.37            | 12.60            | 50.14:49.86         |
| RuGa/N-rGO-3     | 17.52            | 12.01            | 50.16:49.84         |
| Ru/N-rGO         | 16.40            | N/A              | N/A                 |

**Table S2.** Comparison of the HER performance of the RuGa/N-rGO-2 with some recently reported Ru-based catalysts in 0.5 M H<sub>2</sub>SO<sub>4</sub> solution.

| Catalysts                            | Overpotential at<br>10 mA cm <sup>-2</sup> (mV) | Tafel slope<br>(mV dec <sup>-1</sup> ) | References                                                     |
|--------------------------------------|-------------------------------------------------|----------------------------------------|----------------------------------------------------------------|
| <b>RuGa/N-rGO-2</b>                  | <b>32</b>                                       | <b>29.0</b>                            | <b>This work</b>                                               |
| Ru-Cu-2                              | 34                                              | 48                                     | <i>Nano Energy</i> , 2022, <b>92</b> , 106763                  |
| RuP <sub>2</sub> @NPC                | 38                                              | 38                                     | <i>Angew. Chem. Int. Ed.</i> , 2017, <b>56</b> ,<br>11559      |
| Ru <sub>2</sub> B <sub>3</sub> @BNC  | 41                                              | 60.7                                   | <i>Nano Energy</i> , 2020, <b>75</b> , 104881                  |
| Co-SAC/RuO <sub>2</sub>              | 45                                              | 58                                     | <i>Angew. Chem. Int. Ed.</i> , 2022, <b>61</b> ,<br>e202114951 |
| Ru/RuS <sub>2</sub> -2               | 45                                              | 24.4                                   | <i>Angew. Chem. Int. Ed.</i> , 2021, <b>60</b> ,<br>12328      |
| Pd@Ru (111) Ths                      | 48                                              | 51                                     | <i>ACS Nano</i> , 2021, <b>15</b> , 5178                       |
| Ru <sub>1</sub> CoP/CDs-<br>1000     | 49                                              | 51.6                                   | <i>Angew. Chem. Int. Ed.</i> , 2021, <b>60</b> ,<br>7234       |
| NiRu@N-C                             | 50                                              | 36                                     | <i>J. Mater. Chem. A</i> , 2018, <b>6</b> , 1376               |
| Ni@Ni <sub>2</sub> P-Ru<br>HNRs      | 51                                              | 35                                     | <i>J. Am. Chem. Soc.</i> , 2018, <b>140</b> , 2731             |
| RuB <sub>2</sub>                     | 52                                              | 66.9                                   | <i>ACS Energy Lett.</i> , 2020, <b>5</b> , 2909                |
| Ru@Co-SAs/N-C                        | 57                                              | 55                                     | <i>Nano Energy</i> , 2019, <b>59</b> , 472                     |
| RuNi/CQDs                            | 58                                              | 55                                     | <i>Angew. Chem. Int. Ed.</i> , 2020, <b>59</b> ,<br>1718       |
| Ru-HPC                               | 61.6                                            | 66.8                                   | <i>Nano Energy</i> , 2019, <b>58</b> , 1                       |
| Ru-RuO <sub>2</sub> @NPC             | 68                                              | 56                                     | <i>Appl. Catal. B.</i> , 2022, <b>302</b> , 120838             |
| CuPor-RuN <sub>3</sub>               | 73                                              | 73                                     | <i>Adv. Funct. Mater.</i> , 2021, <b>31</b> ,<br>2107290       |
| RuP <sub>2</sub> @PC                 | 77.2                                            | 41.2                                   | <i>J. Mater. Chem. A</i> , 2021, <b>9</b> , 12276              |
| 2.20wt% Ru Sas-<br>Ni <sub>2</sub> P | 125                                             | 71                                     | <i>Nano Energy</i> , 2021, <b>80</b> , 105467                  |
| Cu <sub>2-x</sub> S@Ru NPs           | 129                                             | 51                                     | <i>Small</i> , 2017, <b>13</b> , 1700052                       |

**Table S3.** Comparison of the HER performance of the RuGa/N-rGO-2 with some recently reported Ru-based catalysts in 1.0 M KOH solution.

| Catalysts                    | Overpotential at<br>10 mA cm <sup>-2</sup> (mV) | Tafel slope<br>(mV dec <sup>-1</sup> ) | References                                             |
|------------------------------|-------------------------------------------------|----------------------------------------|--------------------------------------------------------|
| <b>RuGa/N-rGO-2</b>          | <b>20</b>                                       | <b>28.2</b>                            | <b>This work</b>                                       |
| RuO <sub>2</sub> @C          | 20                                              | 46                                     | <i>Nano Energy</i> , 2019, <b>55</b> , 49              |
| RuO <sub>2</sub> /NiO/NF     | 22                                              | 31.7                                   | <i>Small</i> , 2018, <b>14</b> , 1704073               |
| RuCoP                        | 23                                              | 37                                     | <i>Energy Environ. Sci.</i> , 2018, <b>11</b> , 1819   |
| 4H/fcc Ru NTs                | 23                                              | 29.4                                   | <i>Small</i> , 2018, <b>14</b> , 1801090               |
| Ru <sub>2</sub> -GC          | 25                                              | 65                                     | <i>ACS Catal.</i> , 2018, <b>8</b> , 11094             |
| Ru@NC                        | 26                                              | 36                                     | <i>Angew. Chem. Int. Ed.</i> , 2018, <b>57</b> , 5848  |
| RuCo@NC                      | 28                                              | 31                                     | <i>Nat. Commun.</i> , 2017, <b>8</b> , 14969           |
| Ni@Ni <sub>2</sub> P-Ru HNRs | 31                                              | 41                                     | <i>J. Am. Chem. Soc.</i> , 2018, <b>140</b> , 2731     |
| Ru@CN-0.16                   | 32                                              | 53                                     | <i>Energy Environ. Sci.</i> , 2018, <b>11</b> , 800    |
| Ru/TiO <sub>2</sub>          | 32                                              | 60                                     | <i>Nano Energy</i> , 2021, <b>88</b> , 106211          |
| NiRu@N-C                     | 32                                              | 64                                     | <i>J. Mater. Chem. A</i> , 2018, <b>6</b> , 1376       |
| Ru-Cu-2                      | 33                                              | 37                                     | <i>Nano Energy</i> , 2022, <b>92</b> , 106763          |
| Ru-Ru <sub>2</sub> P@PC      | 43.4                                            | 35.1                                   | <i>J. Mater. Chem. A</i> , 2019, <b>7</b> , 5621       |
| RuP <sub>2</sub> @NPC        | 52                                              | 69                                     | <i>Angew. Chem. Int. Ed.</i> , 2017, <b>56</b> , 11559 |
| Ru@CNT                       | 63                                              | 76                                     | <i>Nat. Commun.</i> , 2021, <b>12</b> , 4018           |
| RuP <sub>2</sub> @PC         | 78.9                                            | 36.7                                   | <i>J. Mater. Chem. A</i> , 2021, <b>9</b> , 12276      |
| Ru-RuO <sub>2</sub> @NPC     | 79                                              | 73                                     | <i>Appl. Catal. B.</i> , 2022, <b>302</b> , 120838     |
| Cu <sub>2-x</sub> S@Ru NPS   | 82                                              | 48                                     | <i>Small</i> , 2017, <b>13</b> , 1700052               |

**Table S4.** Comparison of the HER performance of the RuGa/N-rGO-2 with some recently reported electrocatalysts in 1.0 M KOH solution.

| Catalysts                                                          | Overpotential at                | Overpotential at                 | References                                              |
|--------------------------------------------------------------------|---------------------------------|----------------------------------|---------------------------------------------------------|
|                                                                    | 500 mA cm <sup>-2</sup><br>(mV) | 1000 mA cm <sup>-2</sup><br>(mV) |                                                         |
| <b>RuGa/N-rGO-2</b>                                                | <b>105</b>                      | <b>156</b>                       | <b>This work</b>                                        |
| MoNi <sub>4</sub> /MoO <sub>3-x</sub>                              | 114                             | 156                              | <i>Adv. Mater.</i> , 2017, <b>29</b> ,<br>1703311       |
| FeIr/NF                                                            | 125                             | 204                              | <i>Appl. Catal. B.</i> , 2020, <b>278</b> ,<br>119327   |
| Ru-CoO <sub>x</sub> /NF                                            | ~170                            | 252                              | <i>Small</i> , 2021, <b>17</b> , 2102777                |
| NiMoO <sub>x</sub> /NiMoS                                          | 174                             | 236                              | <i>Nat. Commun.</i> , 2020, <b>11</b> , 5462            |
| MoS <sub>2</sub> /Mo <sub>2</sub> C                                | 191                             | 220                              | <i>Nat. Commun.</i> , 2019, <b>10</b> , 269             |
| Co-Mo <sub>5</sub> N <sub>6</sub>                                  | ~200                            | 280                              | <i>Adv. Energy Mater.</i> , 2020 <b>10</b> ,<br>2002176 |
| Ni <sub>3</sub> S <sub>2</sub> /Cr <sub>2</sub> S <sub>3</sub> @NF | ~210                            | 227                              | <i>J. Am. Chem. Soc.</i> 2022, <b>144</b> ,<br>6028     |
| P-Fe <sub>3</sub> O <sub>4</sub> /IF                               | ~210                            | ~240                             | <i>Adv. Mater.</i> , 2019, <b>31</b> ,<br>1905107       |
| FeP/Ni <sub>2</sub> P                                              | ~220                            | ~265                             | <i>Nat. Commun.</i> , 2018, <b>9</b> , 2551             |
| Ni <sub>2</sub> P/NF                                               | ~230                            | 306                              | <i>J. Am. Chem. Soc.</i> , 2019, <b>141</b> ,<br>7537   |
| Ni <sub>2(1-x)</sub> Mo <sub>2x</sub> P                            | 240                             | 294                              | <i>Nano Energy</i> , 2018, <b>53</b> , 492              |
| Ni <sub>3</sub> N/Pt<br>nanosheets                                 | ~270                            | ~440                             | <i>Adv. Energy Mater.</i> 2017, <b>7</b> ,<br>1601390   |
| HC-MoS <sub>2</sub> /Mo <sub>2</sub> C                             | ~390                            | 441                              | <i>Nat. Commun.</i> , 2020, <b>11</b> , 3724            |
| NC/Ni <sub>3</sub> Mo <sub>3</sub> N/NF                            | ~400                            | ~680                             | <i>Appl. Catal. B.</i> , 2020, <b>272</b> ,<br>118956   |
| IrFe/NC                                                            | ~430                            | 850                              | <i>Appl. Catal. B.</i> , 2019, <b>258</b> ,<br>117965   |



## References

- 1 G. Kresse and J. Furthmüller, *Phys. Rev. B*, 1996, **54**, 11169-11186.
- 2 G. Kresse and J. Hafner, *Phys. Rev. B*, 1993, **47**, 558-561.
- 3 P. E. Blöchl, *Phys. Rev. B*, 1994, **50**, 17953-17979.
- 4 B. Hammer, L. B. Hansen and J. K. Nørskov, *Phys. Rev. B*, 1999, **59**, 7413-7421.
- 5 J. P. Perdew, K. Burke and M. Ernzerhof, *Phys. Rev. Lett.*, 1996, **77**, 3865-3868.
- 6 J. Klimeš, D. R. Bowler and A. Michaelides, *Phys. Rev. B*, 2011, **83**, 195131.
- 7 S. Grimme, J. Antony, S. Ehrlich and H. Krieg, *J. Chem. Phys.*, 2010, **132**, 154104.
